# Supplementary material for: Perceptions and experiences with district health information system software to collect and utilize health data in Bangladesh: a qualitative exploratory study
Source: PubMed Central journal article supplement (PMC7249629; doi:10.1186/s12913-020-05322-2), 2020-05-26
Supplement: 12913_2020_5322_MOESM7_ESM.pdf [file 12913_2020_5322_MOESM7_ESM.pdf]

**Table:** Consolidated criteria for reporting qualitative studies (COREQ): 32-item checklist

| No                                             | Item                    | Guide questions/description                                 | Reference                                                                                                                                                             |
|------------------------------------------------|-------------------------|-------------------------------------------------------------|-----------------------------------------------------------------------------------------------------------------------------------------------------------------------|
| <b>Domain 1: Research team and reflexivity</b> |                         |                                                             |                                                                                                                                                                       |
| Personal Characteristics                       |                         |                                                             |                                                                                                                                                                       |
| 1.                                             | Interviewer/facilitator | Which author/s conducted the interview or focus group?      | TB & FAK                                                                                                                                                              |
| 2.                                             | Credentials             | What were the researcher's credentials? <i>E.g. PhD, MD</i> | Title page: line 6- 14<br>PhD (IA,AB)<br>MD(TB,AR,JF)<br>MPH (TB,SMK,AR,JF,IA)<br>MSS (FAK)<br>MSc (SI, MP)                                                           |
| 3.                                             | Occupation              | What was their occupation at the time of the study?         | Title page: line 6- 14                                                                                                                                                |
| 4.                                             | Gender                  | Was the researcher male or female?                          | Female(TB,SMK,AB,JF,FAK)<br>Male (IA,AR,MP,SI)                                                                                                                        |
| 5.                                             | Experience and training | What experience or training did the researcher have?        | Title page: line 6- 14<br>MPH:<br>(TB,SMK,AR,JF,IA,AB)<br>Masters in Social Science :<br>FAK<br>Training on qualitative data collection and analysis:<br>TB,FAK & SMK |
|                                                |                         |                                                             |                                                                                                                                                                       |

| No                             | Item                                     | Guide questions/description                                                                                                                                     | Reference                                                                                     |
|--------------------------------|------------------------------------------|-----------------------------------------------------------------------------------------------------------------------------------------------------------------|-----------------------------------------------------------------------------------------------|
| Relationship with participants |                                          |                                                                                                                                                                 |                                                                                               |
| 6.                             | Relationship established                 | Was a relationship established prior to study commencement?                                                                                                     | Data collection methods line 124-125                                                          |
| 7.                             | Participant knowledge of the interviewer | What did the participants know about the researcher? <i>e.g. personal goals, reasons for doing the research</i>                                                 | Data collection methods line 125-126                                                          |
| 8.                             | Interviewer characteristics              | What characteristics were reported about the interviewer/facilitator? <i>e.g. Bias, assumptions, reasons and interests in the research topic</i>                | Data collection methods line 126-127                                                          |
| <b>Domain 2: study design</b>  |                                          |                                                                                                                                                                 |                                                                                               |
| Theoretical framework          |                                          |                                                                                                                                                                 |                                                                                               |
| 9.                             | Methodological orientation and Theory    | What methodological orientation was stated to underpin the study? <i>e.g. grounded theory, discourse analysis, ethnography, phenomenology, content analysis</i> | Data analysis line 134                                                                        |
| Participant selection          |                                          |                                                                                                                                                                 |                                                                                               |
| 10.                            | Sampling                                 | How were participants selected? <i>e.g. purposive, convenience, consecutive, snowball</i>                                                                       | Data collection methods line 113,115 & 118<br>Convenient for IDI ,<br>purposive for FGD & KII |
| 11.                            | Method of approach                       | How were participants approached? <i>e.g. face-to-face, telephone, mail, email</i>                                                                              | Data collection methods<br>Line 123 (Face to face)                                            |

| No              | Item                         | Guide questions/description                                                              | Reference                                                                             |
|-----------------|------------------------------|------------------------------------------------------------------------------------------|---------------------------------------------------------------------------------------|
| 12.             | Sample size                  | How many participants were in the study?                                                 | Study participants line 93 & table:1 total sample size 566                            |
| 13.             | Non-participation            | How many people refused to participate or dropped out? Reasons?                          | None                                                                                  |
| Setting         |                              |                                                                                          |                                                                                       |
| 14.             | Setting of data collection   | Where was the data collected? e.g. <i>home, clinic, workplace</i>                        | Data collection methods line 122 (office premises, after office hour in a quiet room) |
| 15.             | Presence of non-participants | Was anyone else present besides the participants and researchers?                        | Data collection methods line 122-123 (Interviewer, interviewee & note taker)          |
| 16.             | Description of sample        | What are the important characteristics of the sample? e.g. <i>demographic data, date</i> | Study participants line 96 to 103                                                     |
| Data collection |                              |                                                                                          |                                                                                       |
| 17.             | Interview guide              | Were questions, prompts, guides provided by the authors? Was it pilot tested?            | Data collection methods line 110-111                                                  |
| 18.             | Repeat interviews            | Were repeat interviews carried out? If yes, how many?                                    | No                                                                                    |
| 19.             | Audio/visual recording       | Did the research use audio or visual recording to collect the data?                      | Data collection methods line 128-129 (Audio recorded)                                 |
| 20.             | Field notes                  | Were field notes made during and/or after the interview or focus group?                  | Data collection methods line 129-130 (during interview)                               |

| No                                     | Item                           | Guide questions/description                                              | Reference                                                              |
|----------------------------------------|--------------------------------|--------------------------------------------------------------------------|------------------------------------------------------------------------|
| 21.                                    | Duration                       | What was the duration of the interviews or focus group?                  | Data collection methods line 121                                       |
| 22.                                    | Data saturation                | Was data saturation discussed?                                           | Data collection methods line 124                                       |
| 23.                                    | Transcripts returned           | Were transcripts returned to participants for comment and/or correction? | No                                                                     |
| <b>Domain 3: analysis and findings</b> |                                |                                                                          |                                                                        |
| Data analysis                          |                                |                                                                          |                                                                        |
| 24.                                    | Number of data coders          | How many data coders coded the data?                                     | Data analysis line 140-141<br>Two data coders                          |
| 25.                                    | Description of the coding tree | Did authors provide a description of the coding tree?                    | Data analysis section line 138-142                                     |
| 26.                                    | Derivation of themes           | Were themes identified in advance or derived from the data?              | Data analysis section line 141<br>In advance and derived from the data |
| 27.                                    | Software                       | What software, if applicable, was used to manage the data?               | Data analysis section line 138                                         |
| 28.                                    | Participant checking           | Did participants provide feedback on the findings?                       | Data analysis section line 146 (yes through stakeholder workshop)      |
| Reporting                              |                                |                                                                          |                                                                        |
| 29.                                    | Quotations presented           | Were participant quotations presented to illustrate the themes /         | Result section<br>Line                                                 |

| No  | Item                         | Guide questions/description                                             | Reference                                           |
|-----|------------------------------|-------------------------------------------------------------------------|-----------------------------------------------------|
|     |                              | findings? Was each quotation identified? e.g. <i>participant number</i> | 169,176,194,225,236,254,264,274,284,301,310,317,333 |
| 30. | Data and findings consistent | Was there consistency between the data presented and the findings?      | Yes                                                 |
| 31. | Clarity of major themes      | Were major themes clearly presented in the findings?                    | Yes Result section line 147 to 327                  |
| 32. | Clarity of minor themes      | Is there a description of diverse cases or discussion of minor themes?  | Yes, data analysis section line 137 to 140          |
